# Supplementary material for: Nanomicrosphere sustained-release urokinase systems with antioxidant properties for deep vein thrombosis therapy
Source: Royal Society of Chemistry journal article supplement (doi:10.1039/d3ra07221e), 2024-01-01
Supplement: d3ra07221e1.pdf [file d3ra07221e1.pdf]

**Supporting information:**

**Nanomicrosphere sustained-release urokinase systems with antioxidant properties for deep vein thrombosis therapy**

Shun Xiao<sup>a</sup>, Xiaozhi Sun<sup>a</sup>, Chong Wang<sup>b</sup>, Jianlie Wu<sup>c</sup>, Kun Zhang<sup>a</sup>, Mingjin Guo<sup>a\*\*</sup>, Bing Liu<sup>a\*</sup>

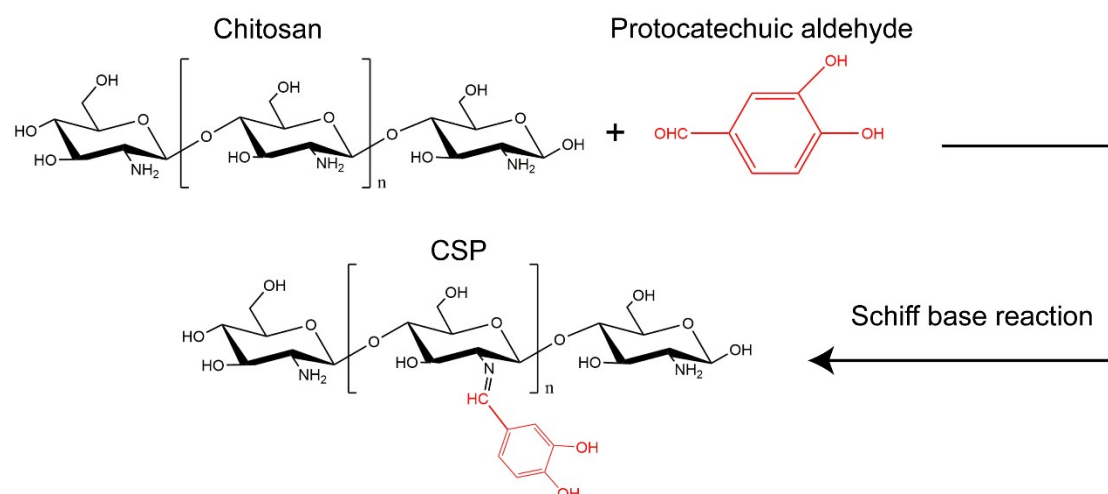

**Fig. S1.** The synthesis process of CSP microsphere.

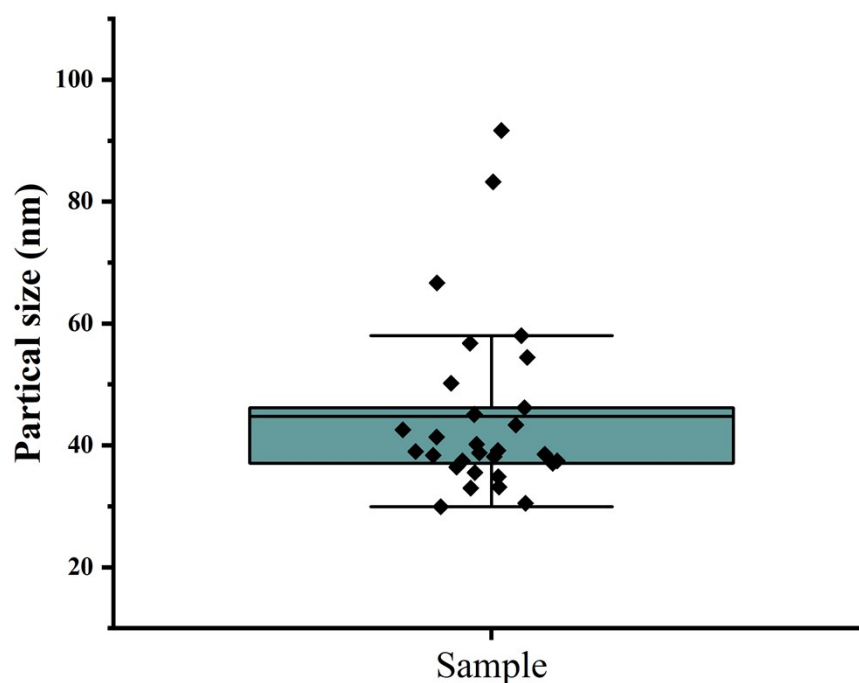

**Fig. S2.** The particle size of CPT microsphere.

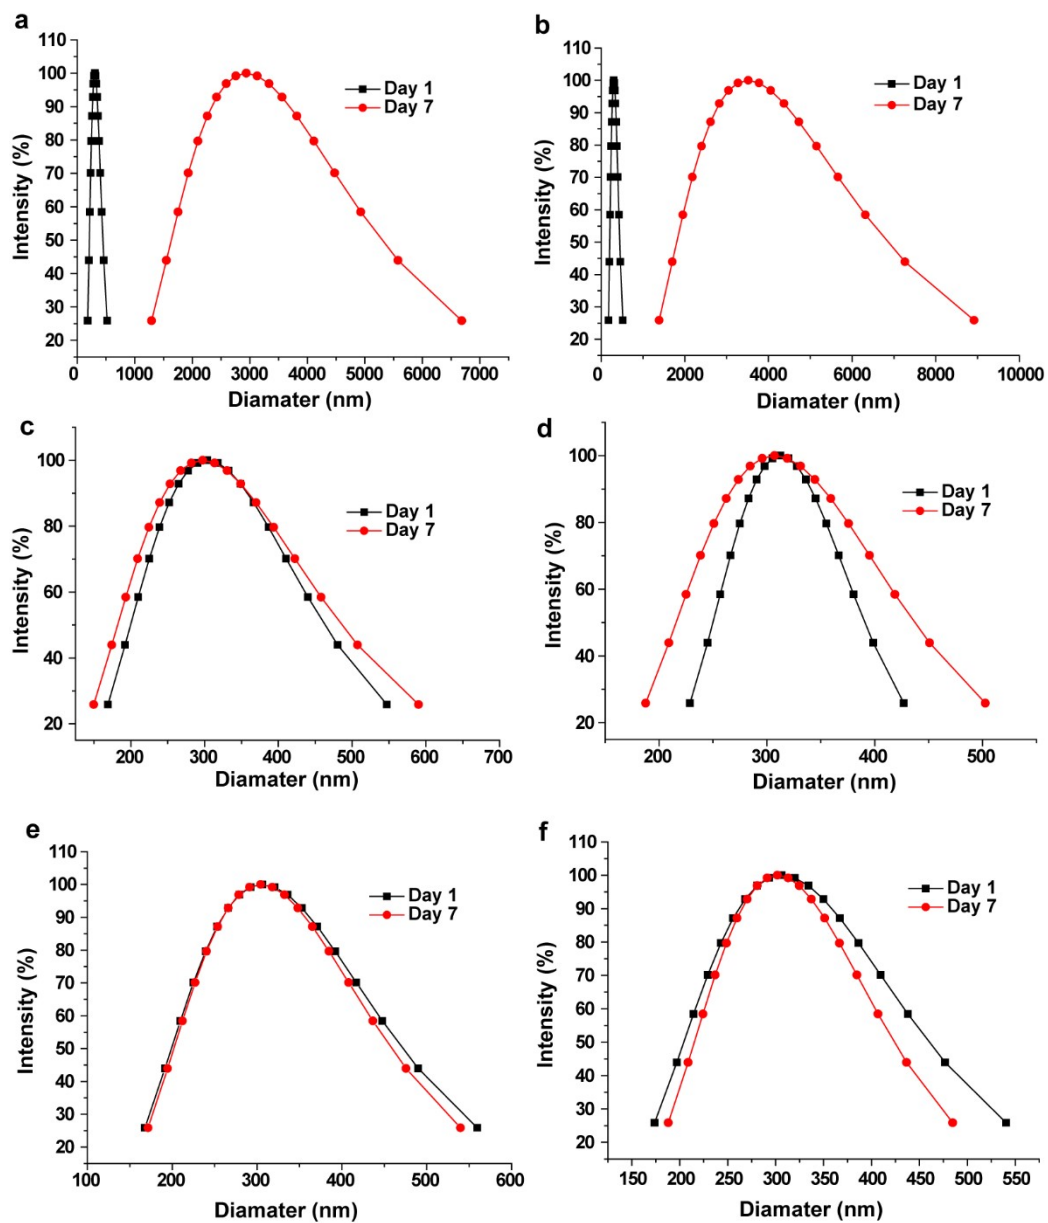

**Fig. S3.** a, b) DLS of CPT microspheres in SBF and PBS; c, d) DLS of CTB microspheres in SBF and PBS; e, f) DLS of CTU microspheres in SBF and PBS.

**Table. S1** DLS data for CPT microspheres, CTB microspheres and CTU microspheres in SBF and PBS.

| DMEM | Day 1          | Day 7             |
|------|----------------|-------------------|
| CPT  | 299.2 ± 9.7 nm | 2941.5 ± 571.4 nm |
| CTB  | 308.4 ± 4.3 nm | 301.7 ± 4.9 nm    |
| CTU  | 304.8 ± 2.8 nm | 303.2 ± 1.2 nm    |

  

| SBF | Day 1           | Day 7             |
|-----|-----------------|-------------------|
| CPT | 305.2 ± 27.2 nm | 2942.2 ± 571.9 nm |
| CTB | 311.8 ± 11.0 nm | 321.7 ± 48.4 nm   |
| CTU | 321.4 ± 15.0 nm | 329.9 ± 29.3 nm   |

  

| PBS | Day 1           | Day 7             |
|-----|-----------------|-------------------|
| CPT | 281.9 ± 22.4 nm | 2875.5 ± 554.9 nm |
| CTB | 298.4 ± 14.3 nm | 331.7 ± 22.0 nm   |
| CTU | 314.8 ± 10.3 nm | 339.9 ± 33.3 nm   |

**Table. S2** Zeta potentials for CPT microspheres, CTB microspheres and CTU microspheres.

|     | Zeta potentials (mV) |
|-----|----------------------|
| CPT | 10.9 ± 1.3           |
| CTB | -3.9 ± 1.4           |
| CTU | 12.1 ± 1.5           |

**Table. S3** The UK loading efficiency of CTU microspheres with different UK concentrations.

| Concentration (µg/mL) | The UK loading efficiency (%) |
|-----------------------|-------------------------------|
| 2.5                   | 97.9 ± 0.2                    |
| 5                     | 97.7 ± 0.5                    |
| 10                    | 96.0 ± 5.0                    |
| 15                    | 77.4 ± 4.7                    |
| 20                    | 66.1 ± 4.4                    |

**Table. S4** The UK loading percentage of CTU microspheres with different UK concentrations.

| Concentration ( $\mu\text{g/mL}$ ) | The UK loading percentage (%) |
|------------------------------------|-------------------------------|
| 2.5                                | 0.24                          |
| 5                                  | 0.49                          |
| 10                                 | $0.95 \pm 0.05$               |
| 15                                 | $1.15 \pm 0.07$               |
| 20                                 | $1.3 \pm 0.08$                |

**Table. S5** The cumulative release of UK for CTU microspheres.

| Time (min) | Cumulative release (%) |
|------------|------------------------|
| 5          | $14.7 \pm 1.9$         |
| 10         | $27.8 \pm 2.1$         |
| 20         | $36.6 \pm 1.2$         |
| 40         | $47.3 \pm 2.9$         |
| 60         | $54.1 \pm 6.7$         |
| 120        | $60.9 \pm 4.9$         |
| 180        | $64.2 \pm 2.3$         |
| 240        | $66.6 \pm 1.5$         |
| 300        | $68.4 \pm 1.3$         |
| 360        | $71.2 \pm 0.4$         |
| 720        | $77.8 \pm 2.0$         |
| 1440       | $81.1 \pm 2.5$         |
| 2160       | $83.6 \pm 3.7$         |
| 2880       | $85.6 \pm 2.4$         |

**Table. S6** Free radical scavenging ratio of CTU microspheres.

| Concentration (mg/mL) | DPPH $\cdot$     | PTIO $\cdot$     | $\cdot\text{OH}$ |
|-----------------------|------------------|------------------|------------------|
| 5                     | $22.4 \pm 0.8\%$ | $19.0 \pm 0.8\%$ | $5.2 \pm 0.4\%$  |
| 10                    | $41.1 \pm 1.5\%$ | $39.3 \pm 2.1\%$ | $23.7 \pm 2.0\%$ |
| 15                    | $58.9 \pm 1.6\%$ | $57.9 \pm 2.0\%$ | $43.1 \pm 2.4\%$ |
| 20                    | $61.9 \pm 1.5\%$ | $58.7 \pm 2.5\%$ | $65.0 \pm 2.6\%$ |
